# Supplementary material
Source: PubMed Central journal article supplement (PMC7449181)
Supplement: AAC.00668-20-s0001.pdf [file AAC.00668-20-s0001.pdf]

1 **SUPPLEMENTAL MATERIAL**

2

3 **Supplemental Table 1 – Frequency change of antibiotic resistance of resistant mutants**

4 **after 24h in homogenous and structured populations.** Frequency change of resistance

5 ( $\Delta AR$ ) was calculated as  $\Delta AR = [(AR_{\text{final frequency}} - AR_{\text{initial frequency}}) / AR_{\text{initial frequency}}]$ . The values on

6 the table represent the average and 2x standard error of at least 3 biological replicates.

| <b>Gene and mutation</b>                                 | <b>Resistance to antibiotic</b> | <b>Homogenous populations</b> | <b>Structured populations</b> |
|----------------------------------------------------------|---------------------------------|-------------------------------|-------------------------------|
| <i>rpsL</i> <sup>K43N</sup>                              | streptomycin                    | -0.54 ± 0.07                  | -0.56 ± 0.07                  |
| <i>rpsL</i> <sup>K43T</sup>                              | streptomycin                    | -0.31 ± 0.03                  | -0.32 ± 0.05                  |
| <i>rpsL</i> <sup>K43R</sup>                              | streptomycin                    | -0.07 ± 0.17                  | -0.06 ± 0.08                  |
| <i>rpsL</i> <sup>K88R</sup>                              | streptomycin                    | -0.14 ± 0.12                  | -0.11 ± 0.14                  |
| <i>rpoB</i> <sup>S512F</sup>                             | rifampicin                      | -0.54 ± 0.09                  | -0.43 ± 0.12                  |
| <i>rpoB</i> <sup>H526D</sup>                             | rifampicin                      | -0.49 ± 0.11                  | -0.44 ± 0.03                  |
| <i>rpoB</i> <sup>H526Y</sup>                             | rifampicin                      | -0.36 ± 0.09                  | -0.32 ± 0.10                  |
| <i>rpoB</i> <sup>R529H</sup>                             | rifampicin                      | -0.92 ± 0.04                  | -0.84 ± 0.05                  |
| <i>rpoB</i> <sup>S531F</sup>                             | rifampicin                      | -0.45 ± 0.05                  | -0.50 ± 0.06                  |
| <i>rpoB</i> <sup>I572F</sup>                             | rifampicin                      | -0.55 ± 0.02                  | -0.51 ± 0.05                  |
| <i>gyrA</i> <sup>S83L</sup>                              | fluroquinolone                  | 0.02 ± 0.11                   | 0.08 ± 0.09                   |
| <i>gyrA</i> <sup>D87Y</sup>                              | fluroquinolone                  | -0.09 ± 0.09                  | 0.05 ± 0.06                   |
| <i>rpoB</i> <sup>H526Y</sup> <i>rpsL</i> <sup>K43T</sup> | Rif + Strep                     | -0.88 ± 0.04                  | -0.50 ± 0.05                  |
| <i>rpoB</i> <sup>H526Y</sup> <i>rpsL</i> <sup>K88R</sup> | Rif + Strep                     | -0.54 ± 0.10                  | -0.18 ± 0.05                  |
| <i>rpoB</i> <sup>R529H</sup> <i>rpsL</i> <sup>K43N</sup> | Rif + Strep                     | -0.89 ± 0.01                  | -0.71 ± 0.05                  |
| <i>rpoB</i> <sup>H526Y</sup> <i>rpsL</i> <sup>K43N</sup> | Rif + Strep                     | -0.92 ± 0.02                  | -0.62 ± 0.04                  |
| <i>gyrA</i> <sup>D87Y</sup> <i>rpoB</i> <sup>I572F</sup> | Fluor + Rif                     | -0.55 ± 0.22                  | -0.14 ± 0.06                  |
| <i>gyrA</i> <sup>S83L</sup> <i>rpoB</i> <sup>H526Y</sup> | Fluor + Rif                     | -0.63 ± 0.11                  | -0.36 ± 0.05                  |
| <i>gyrA</i> <sup>D87Y</sup> <i>rpsL</i> <sup>K43T</sup>  | Fluor + Strep                   | -0.52 ± 0.11                  | -0.30 ± 0.15                  |

7

8

9

10

11

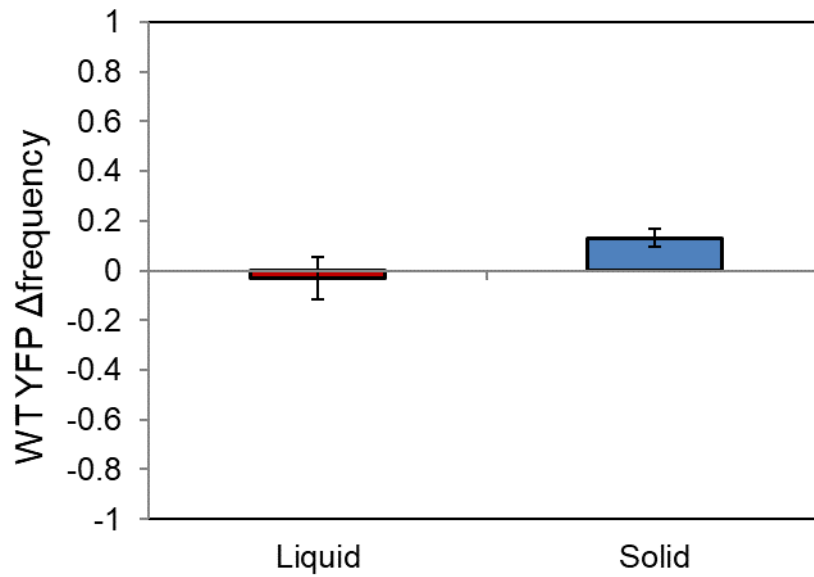

12

13 **Supplemental Fig. 1 – Fluorescence markers are neutral in both homogenous and**  
14 **spatially structured populations.** Two strains susceptible to antibiotics completely isogenic  
15 apart from the YFP gene (conferring yellow fluorescence) or the CFP gene (conferring cyan  
16 fluorescence) were competed against each other in LB liquid with shaking (homogenous  
17 populations) and in LB agar (spatially structured populations) for 24h. The bars represent the  
18 average of at least 3 competition experiments and the error bars represent a 2x standard error  
19 (2SE). There was no significant effect of the fluorescence on the frequency allele of the strains  
20 (one sample two tailed t-test).

21

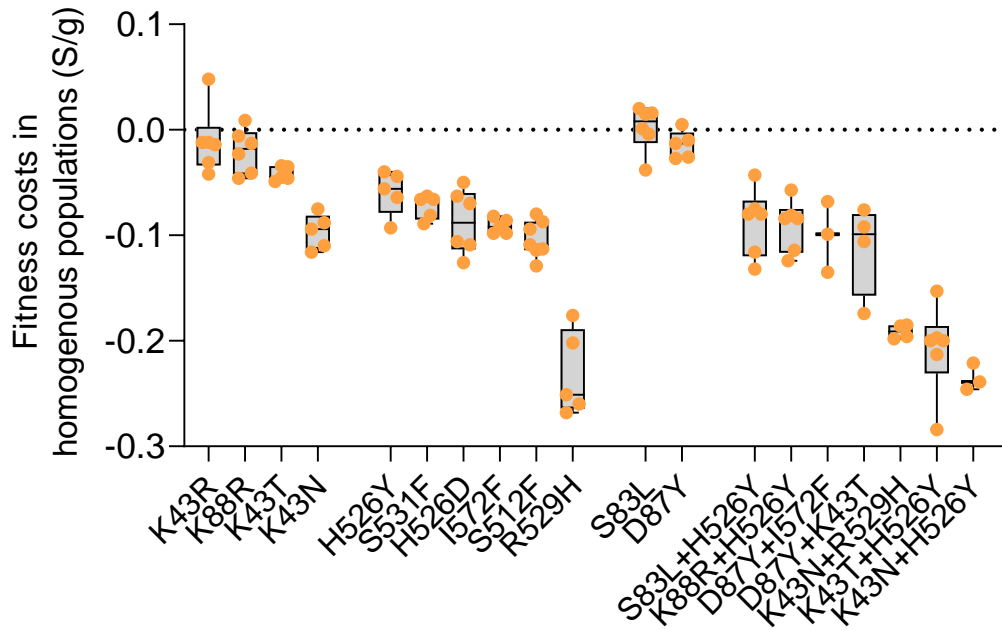

22

23 **Supplemental Fig. 2 – Fitness costs of the AR mutations measured in homogeneous**

24 **populations.** All the mutants competed with the susceptible background in pair-wise

25 competitions in homogeneous populations (liquid LB with shaking). The fitness costs per

26 generation (S/g) of each mutant strain in homogeneous populations was estimated as the per

27 generation difference in Malthusian parameters:  $S = \ln(R_f/R_i)/t$ , where t is the number of

28 generations after 24h growth for the susceptible strain and  $R_f$  and  $R_i$  are the final and initial

29 ratios between resistant and reference strains, respectively.

30

31

32

33

34

35
